# Supplementary material for: Genomic Analysis of Acinetobacter baumannii Isolates Carrying OXA-23 and OXA-58 Genes from Animals Reveals ST1 and ST25 as Major Clonal Lineages
Source: MDPI journal article supplement (doi:10.3390/antibiotics11081045), 2022-08-03
Supplement: s1 [file s1]

**Supplemental Table S4:** Oligonucleotide primers used for single and multiplex PCRs to detect  $\beta$ -lactamase genes in *Acinetobacter baumannii* isolates

| Target gene                   | Primer name | Primer sequence (5'-3')  | Amplicon size | Primer reference |
|-------------------------------|-------------|--------------------------|---------------|------------------|
| <i>bla</i> <sub>OXA-23</sub>  | OXA-23 fwd  | AACCCCGAGTCAGATTGTTC     | 642 bp        | [1]              |
|                               | OXA-23 rev  | ATTTTCCATCTGGCTGCTC      |               |                  |
| <i>bla</i> <sub>OXA-40</sub>  | OXA-40 fwd  | GTTTCTCTCAGTGCATGTTTCATC | 246 bp        | [1]              |
|                               | OXA-40 rev  | CGAATAGAACCAGACATTCTTC   |               |                  |
| <i>bla</i> <sub>OXA-58</sub>  | OXA-58 fwd  | AAGTATTGGGGCTTGTGCTG     | 599 bp        | [1]              |
|                               | OXA-58 rev  | TCAACTTCCGTGCCTATTTG     |               |                  |
| <i>bla</i> <sub>OXA-143</sub> | OXA-143 fwd | TGGCACTTTCAGCAGTTCCT     | 149 bp        | [2]              |
|                               | OXA-143 rev | TAATCTTGAGGGGGCCAACC     |               |                  |
| <i>bla</i> <sub>OXA-235</sub> | OXA-235 fwd | TTGTTGCCTTTACTTAGTTGC    | 768 bp        | [3]              |
|                               | OXA-235 rev | CAAAATTTTAAGACGGATCG     |               |                  |
| <i>bla</i> <sub>NDM</sub>     | NDM-1_F     | CTGAGCACCGCATTAGCC       | 754 bp        | [4]              |
|                               | NDM-1_R     | GGGCCGTATGAGTGATTGC      |               |                  |
| <i>bla</i> <sub>KPC</sub>     | KPC_F       | CAGCTCATTCAAGGGCTTTC     | 533 bp        | [1]              |
|                               | KPC_R       | AGTCATTTGCCGTGCCATAC     |               |                  |
| <i>bla</i> <sub>VIM</sub>     | VIM_F       | AGTGGTGAGTATCCGACAG      | 261 bp        | [1]              |
|                               | VIM_R       | ATGAAAGTGCGTGGAGAC       |               |                  |
| <i>bla</i> <sub>OXA-48</sub>  | OXA-48A     | TTGGTGGCATCGATTATCGG     | 743 bp        | [5]              |
|                               | OXA-48B     | GAGCACTTCTTTTGTGATGGC    |               |                  |
| <i>bla</i> <sub>GES</sub>     | GES_Fwd     | GAAGCTAGAGCGCGAAAAAG     | 744 bp        | [6]              |
|                               | GES_Rev     | ACTTGACCGACAGAGGCAAC     |               |                  |
| <i>bla</i> <sub>GIM</sub>     | GIM-ges F   | TGTAGCGTTGCCAGCTTTAG     | 700 bp        | [7]              |
|                               | GIM-ges R   | GGTCGGTTGCATTAATTTGTTAG  |               |                  |
| <i>bla</i> <sub>IMP</sub>     | IMP_F       | GGAATAGAGTGGCTTAAYTCTC   | 233 bp        | [8]              |
|                               | IMP_R       | GGTTTAAAYAAAACAACCACC    |               |                  |

## Primer references

- Groebner, S.; Linke, D.; Schutz, W.; Fladerer, C.; Madlung, J.; Autenrieth, I.B.; Witte, W.; Pfeifer, Y. Emergence of carbapenem-non-susceptible extended-spectrum  $\beta$ -lactamase-producing *Klebsiella pneumoniae* isolates at the university hospital of Tübingen, Germany. *Journal of medical microbiology* 2009, 58, 912-922, doi:10.1099/jmm.0.005850-0.
- Higgins, P.G.; Lehmann, M.; Seifert, H. Inclusion of OXA-143 primers in a multiplex polymerase chain reaction (PCR) for genes encoding prevalent OXA carbapenemases in *Acinetobacter* spp. *International journal of antimicrobial agents* 2010, 35, 305, doi:10.1016/j.ijantimicag.2009.10.014.
- Higgins, P.G.; Perez-Llarena, F.J.; Zander, E.; Fernandez, A.; Bou, G.; Seifert, H. OXA-235, a novel class D  $\beta$ -lactamase involved in resistance to carbapenems in *Acinetobacter baumannii*. *Antimicrobial agents and chemotherapy* 2013, 57, 2121-2126, doi:10.1128/AAC.02413-12.
- Pfeifer, Y.; Witte, W.; Holfelder, M.; Busch, J.; Nordmann, P.; Poirel, L. NDM-1-producing *Escherichia coli* in Germany. *Antimicrobial agents and chemotherapy* 2011, 55, 1318-1319, doi:10.1128/AAC.01585-10.
- Poirel, L.; Dortet, L.; Bernabeu, S.; Nordmann, P. Genetic features of *bla*<sub>NDM-1</sub>-positive Enterobacteriaceae. *Antimicrobial agents and chemotherapy* 2011, 55, 5403-5407, doi:10.1128/AAC.00585-11.

6. Eller, C. Molecular analysis of extended-spectrum  $\beta$ -lactamase (ESBL)-producing Enterobacteriaceae as colonisers and pathogens in humans. 2014. Dissertation; Faculty of Life Sciences, Technical University Braunschweig, Germany. doi: 10.24355/dbbs.084-201411260838-0.
7. Pfeifer, Y., Robert-Koch Institute Wernigerode, Germany; personal communication
8. Poirel, L.; Walsh, T.R.; Cuvillier, V.; Nordmann, P. Multiplex PCR for detection of acquired carbapenemase genes. *Diagnostic microbiology and infectious disease* 2011, 70, 119-123, doi:10.1016/j.diagmicrobio.2010.12.002.
