# Supplementary material for: Genomic Analysis of Acinetobacter baumannii Isolates Carrying OXA-23 and OXA-58 Genes from Animals Reveals ST1 and ST25 as Major Clonal Lineages
Source: MDPI journal article supplement (doi:10.3390/antibiotics11081045), 2022-08-03
Supplement: s1 [file s1]

**Supplemental Table S5: Oligonucleotide primers used for PCR mapping of *A. baumannii* resistance island *AbaR3***

| PCR No. | Primer-Nr. | Target gene             | Target region | Primer name | 5'-3' sequence         | Position in <i>AbaR3</i> of <i>A. baumannii</i> A85 (GenBank Acc-No. KC118540) | Amplicon size in strain A85* | Primer reference  |
|---------|------------|-------------------------|---------------|-------------|------------------------|--------------------------------------------------------------------------------|------------------------------|-------------------|
| 1       | 1898       | cadR                    | <i>AbaR3</i>  | AbaR3-FP1   | ATCTGCGAGCGTACATGAG    | 59603 - 59621                                                                  | 3.959 bp                     | This study        |
|         | 1900       | topA                    | <i>AbaR3</i>  | AbaR3-RP1   | TGATCTTCTTCACCTTGCC    | 63543 - 63561                                                                  |                              |                   |
| 2       | 326        | bla <sub>TEM-like</sub> | <i>AbaR3</i>  | TEM-FW      | ATGAGTATTCAACATTTCCG   | 86241 - 86260                                                                  | 1.778 bp                     | [1]               |
|         | 1901       | tnpA                    | <i>AbaR3</i>  | AbaR3-RP2   | TGTAACCAACGGATGAATGAGG | 87998 - 88018                                                                  |                              |                   |
| 3       | 1899       | tnpR                    | <i>AbaR3</i>  | AbaR3-FP2   | TCAGAGACCATGGAAAGCATG  | 91477 - 91497                                                                  | 3.861 bp                     | This study        |
|         | 1902       | xerD, intl1             | <i>AbaR3</i>  | AbaR3-RP3   | TAGAACAAGCAGGCATCACG   | 95318 - 95337                                                                  |                              |                   |
| 4       | 1898       | cadR                    | <i>AbaR3</i>  | AbaR3-FP1*  | ATCTGCGAGCGTACATGAG    | 102879 - 102897                                                                | 3.207 bp                     | This study        |
|         | 1903       | uspA                    | <i>AbaR3</i>  | AbaR3-RP4   | TTCAGTCTGGATGCTCATAG   | 106066 - 106085                                                                |                              |                   |
| 5       | 22         | aadA1                   | <i>AbaR3</i>  | aadA1-FOR   | ATGAGGGAAGCGGTGATCG    | 97809 - 97827                                                                  | 3.484 bp                     | [2]<br>This study |
|         | 1904       | resX                    | <i>AbaR3</i>  | AbaR3-RP5   | TCCGCCGGGCAAGGTCATTTTC | 101272 - 101292                                                                |                              |                   |
| 6       | 1905       | aacC1                   | <i>AbaR3</i>  | AbaR3-FP3   | TGACGATCCCGCAGTGGCTC   | 96678 - 96697                                                                  | 3.456 bp                     | This study        |
|         | 1906       | orf5                    | <i>AbaR3</i>  | AbaR3-RP6   | ACAACCTCGTCGATATCACC   | 100114 - 100133                                                                |                              |                   |
| 7       | 1905       | aacC1                   | <i>AbaR3</i>  | AbaR3-FP3   | TGACGATCCCGCAGTGGCTC   | 96678 - 96697                                                                  | 4.615 bp                     | This study        |
|         | 1904       | resX                    | <i>AbaR3</i>  | AbaR3-RP5   | TCCGCCGGGCAAGGTCATTTTC | 101272 - 101292                                                                |                              |                   |

\* The ST1-OXA-58 producing *A. baumannii* isolates from our study that were positive for *AbaR3*-island genes revealed the expected amplicon sizes in all PCR except for PCR no. 3. Our isolates lacked the kanamycin gene *aphA1* and part of its flanking *ISAbal* regions and were thus about 1.416 bp smaller in size (= 2.445 bp) compared to reference strain A85 (=3.861 bp).

#### Primer references

- Grimm, V.; Ezaki, S.; Susa, M.; Knabbe, C.; Schmid, R.D.; Bachmann, T.T. Use of DNA microarrays for rapid genotyping of TEM beta-lactamases that confer resistance. *Journal of clinical microbiology* **2004**, *42*, 3766-3774, doi:10.1128/JCM.42.8.3766-3774.2004.
- Hujer, K.M.; Hujer, A.M.; Hulten, E.A.; Bajaksouzian, S.; Adams, J.M.; Donskey, C.J.; Ecker, D.J.; Massire, C.; Eshoo, M.W.; Sampath, R.; et al. Analysis of antibiotic resistance genes in multidrug-resistant *Acinetobacter* sp. isolates from military and civilian patients treated at the Walter Reed Army Medical Center. *Antimicrobial agents and chemotherapy* **2006**, *50*, 4114-4123, doi:10.1128/AAC.00778-06.
