# Supplementary material for: Genomic Analysis of Acinetobacter baumannii Isolates Carrying OXA-23 and OXA-58 Genes from Animals Reveals ST1 and ST25 as Major Clonal Lineages
Source: MDPI journal article supplement (doi:10.3390/antibiotics11081045), 2022-08-03
Supplement: s1 [file s1]

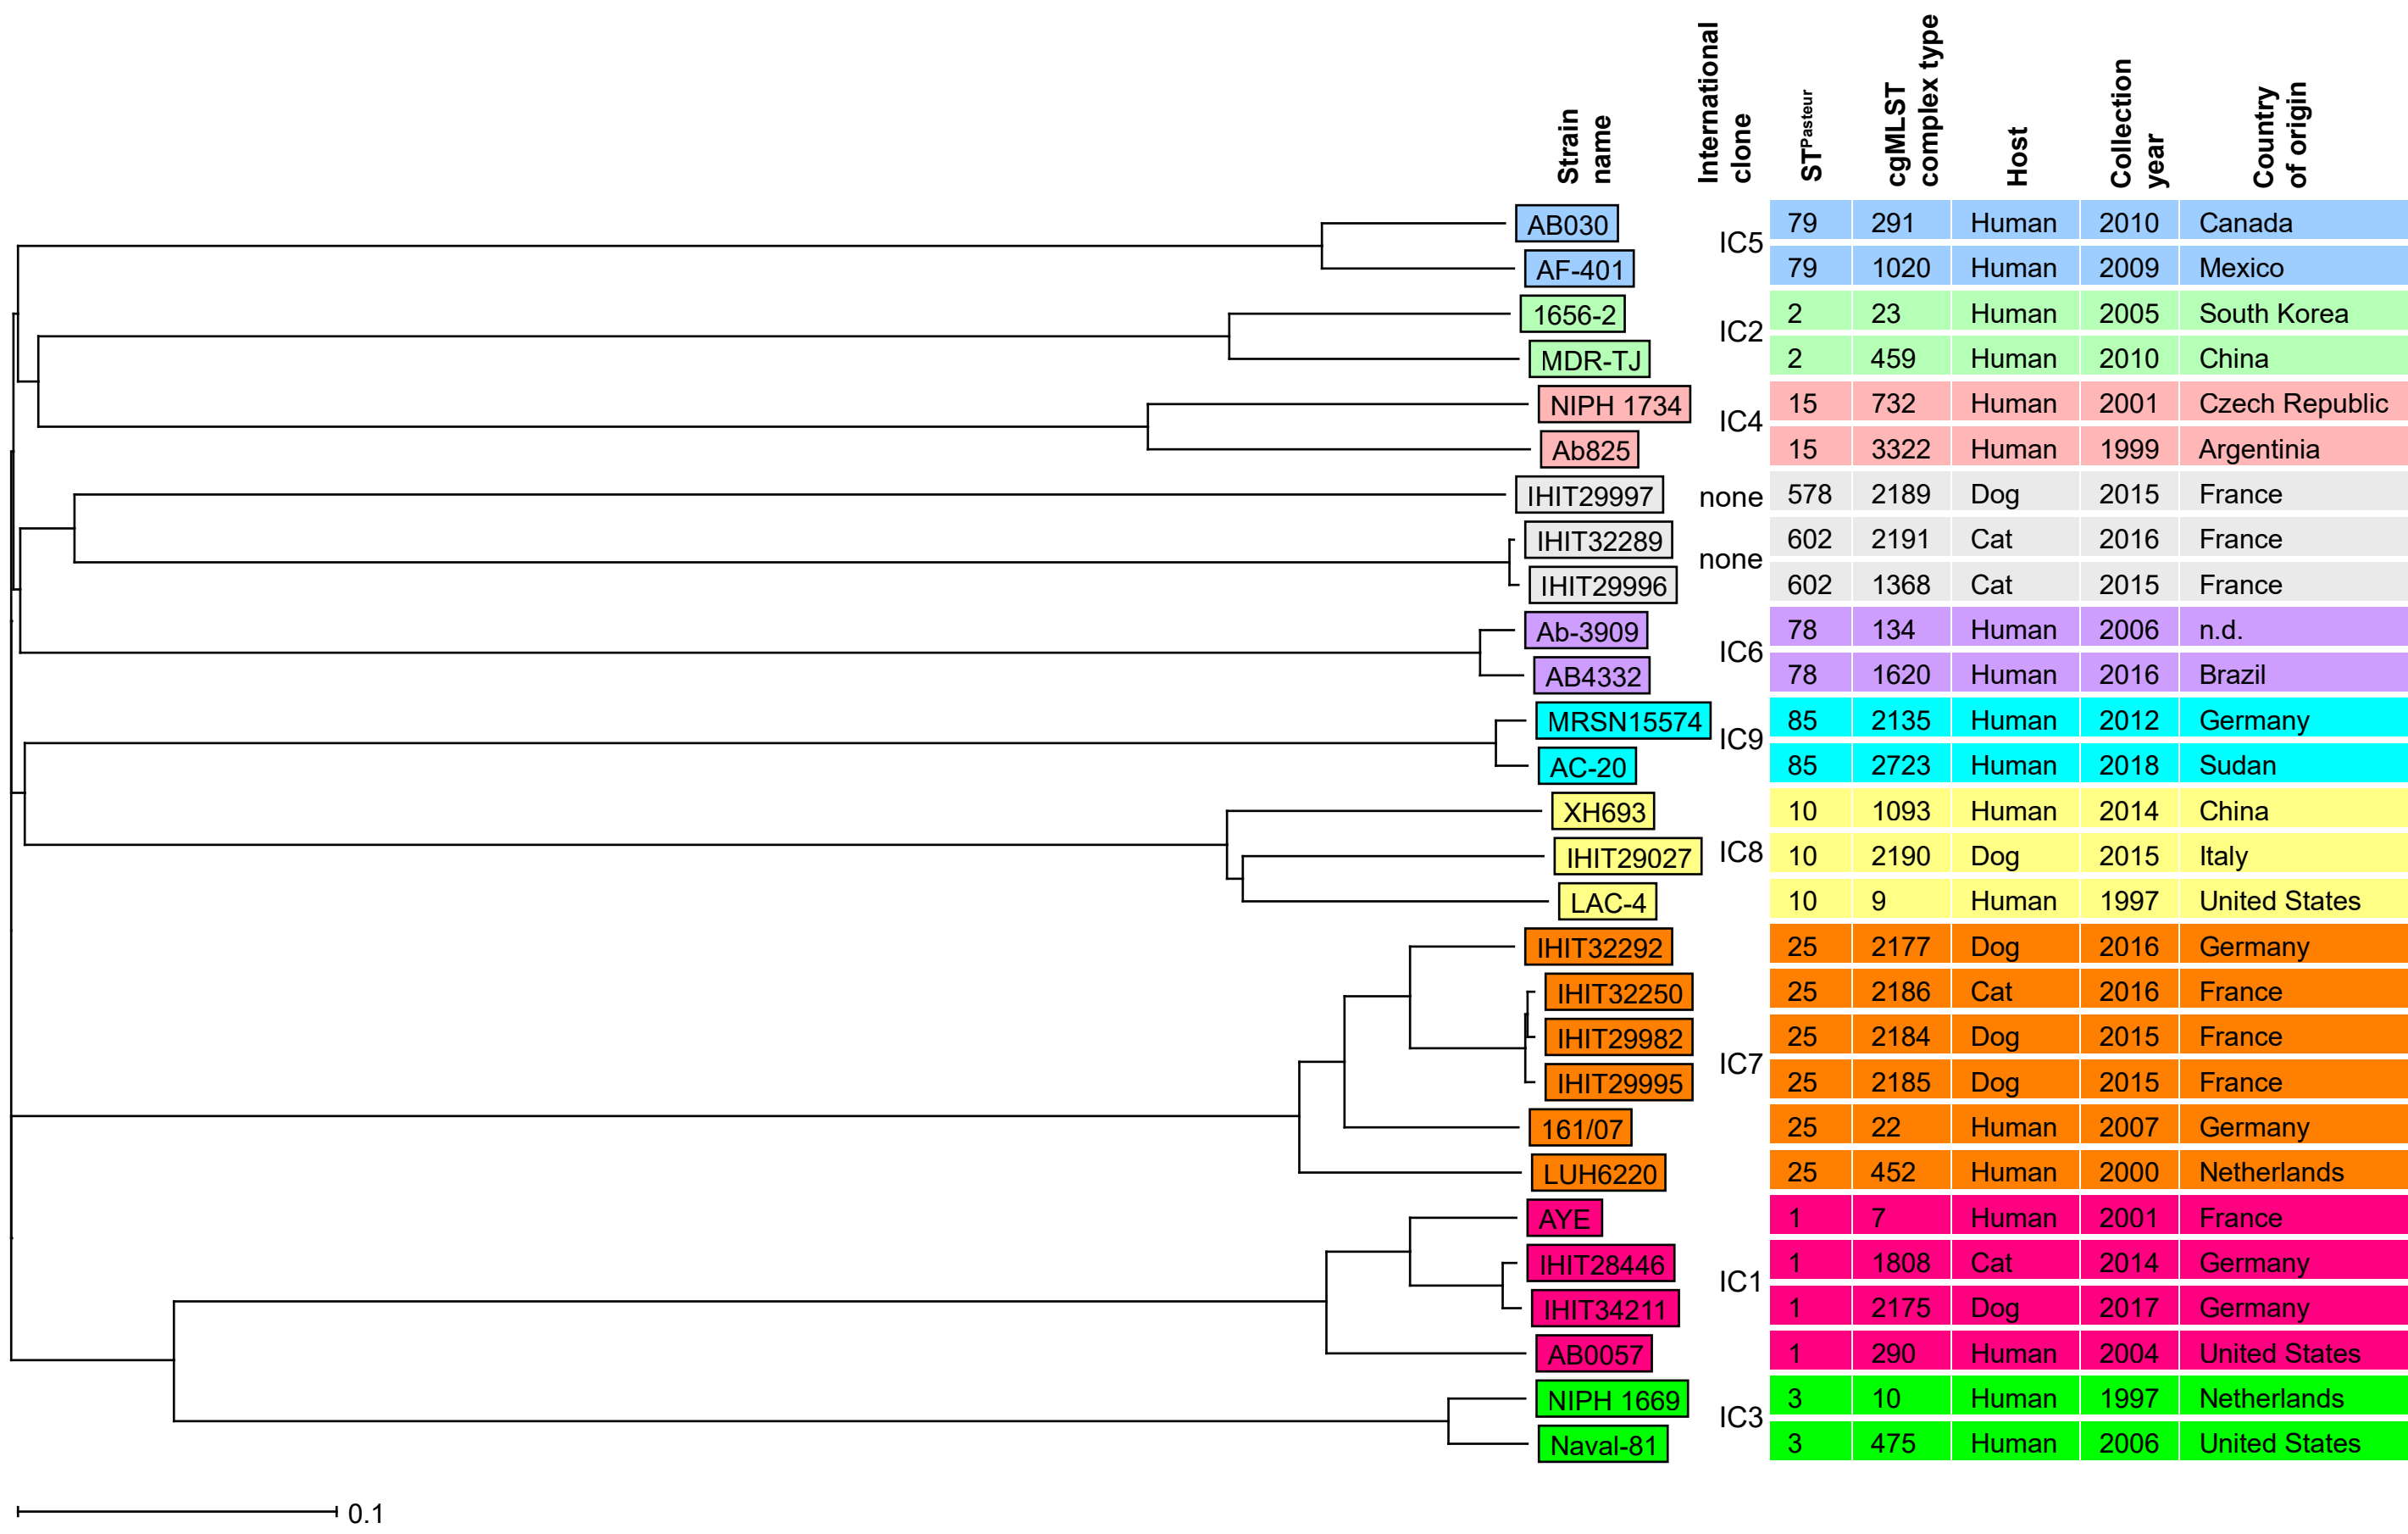

**Supplementary Figure S1:** Neighbor Joining Tree of 28 *Acinetobacter baumannii* isolates based on 2.390 genes included in the cgMLST scheme of Ridom SeqSphere+. The tree is based on a comparison of publicly available *A. baumannii* genomes representing international clones IC1 (AYE, GenBank No. NC\_010410.1; AB0057, NC011586.2), IC2 (1656-2, NC\_017162.1; MDR-TJ, NC\_017847.1), IC3 (NIPH 1669, APOQ01.1; Naval-81, AFDB02.1), IC4 (NIPH 1734, APOX01.1, Ab825, NTFR01.1), IC5 (AB030, NZ\_CP009257.1; AF-401, NZ\_CP018254.1), IC6 (Ab-3909, AEOZ01.1; AB4332, RJLV01.1), IC7 (161/07, JZCA01.1; LUH\_6220, JZBW01.1), IC8 (XH693, LYIY01.1; LAC-4, NZ\_CP007712) and IC9 (MRSN15574, VHGP01.1; AC-20, JABESZ01.1), and CP positive *A. baumannii* isolates from this study that could not be assigned to a known IC by PCR.
