# Supplementary material for: Genomic Analysis of Acinetobacter baumannii Isolates Carrying OXA-23 and OXA-58 Genes from Animals Reveals ST1 and ST25 as Major Clonal Lineages
Source: MDPI journal article supplement (doi:10.3390/antibiotics11081045), 2022-08-03
Supplement: s1 [file s1]

**Supplemental Table S1:** MICs (mg/L) of *A. baumannii* recipient strain ATCC 17978 after transformation of *bla*<sub>OXA</sub> plasmids from *A. baumannii*.

| Strain                    | Trans-formant    | IMP<br>(VITEK) | IMP<br>(E-test) | PIP       | CPD       | CTF       | AMK       | GEN       | TOB       | ENR          | MAR         | TET       | NIT         | CHL        | PMB      | SXT        |
|---------------------------|------------------|----------------|-----------------|-----------|-----------|-----------|-----------|-----------|-----------|--------------|-------------|-----------|-------------|------------|----------|------------|
| OXA-23-producing isolates |                  |                |                 |           |           |           |           |           |           |              |             |           |             |            |          |            |
| IHIT29027                 | CE-AB12          | ≥16            | ≥32             | ≥128      | ≥8        | ≥8        | ≤2        | ≤1        | ≤1        | ≤0.12        | ≤0.5        | ≤1        | ≥512        | 32         | 1        | 160        |
| IHIT30558                 | CE-AB18          | ≥16            | ≥32             | ≥128      | ≥8        | ≥8        | 32        | ≤1        | ≤1        | ≤0.12        | ≤0.5        | ≤1        | ≥512        | ≥64        | 1        | 160        |
| IHIT32292                 | CE-AB14          | ≥16            | ≥32             | ≥128      | ≥8        | ≥8        | ≤2        | ≤1        | ≤1        | ≤0.12        | ≤0.5        | ≤1        | ≥512        | ≥64        | 1        | 160        |
| IHIT32297                 | CE-AB16          | ≥16            | ≥32             | ≥128      | ≥8        | ≥8        | ≤2        | ≤1        | ≤1        | ≤0.12        | ≤0.5        | ≤1        | ≥512        | ≥64        | 1        | 160        |
| IHIT34486                 | CE-AB19          | ≥16            | ≥32             | ≥128      | ≥8        | ≥8        | ≤2        | ≤1        | ≤1        | ≤0.12        | ≤0.5        | ≤1        | ≥512        | ≥64        | 1        | 160        |
| OXA-58-producing isolates |                  |                |                 |           |           |           |           |           |           |              |             |           |             |            |          |            |
| IHIT29480                 | CE-AB24          | ≥16            | 8               | ≥128      | ≥8        | ≥8        | ≤2        | ≤1        | ≤1        | ≤0.12        | ≤0.5        | ≤1        | ≥512        | ≥64        | 1        | 160        |
| IHIT29985                 | CE-AB25          | ≥16            | 8               | ≥128      | ≥8        | ≥8        | ≤2        | ≤1        | ≤1        | ≤0.12        | ≤0.5        | ≤1        | ≥512        | ≥64        | 1        | 160        |
| IHIT29997                 | CE-AB26          | 8              | 6               | ≥128      | ≥8        | ≥8        | ≤2        | ≤1        | ≤1        | ≤0.12        | ≤0.5        | ≤1        | ≥512        | ≥64        | 1        | 160        |
| IHIT31605                 | CE-AB27          | ≥16            | 6               | ≥128      | ≥8        | ≥8        | ≤2        | ≤1        | ≤1        | ≤0.12        | ≤0.5        | ≤1        | ≥512        | ≥64        | 1        | 160        |
| IHIT31634                 | CE-AB28          | 8              | 3               | ≥128      | 4         | ≥8        | ≤2        | ≤1        | ≤1        | ≤0.12        | ≤0.5        | ≤1        | 256         | ≥64        | 1        | 160        |
| IHIT31820                 | CE-AB29          | ≥16            | 4               | ≥128      | ≥8        | ≥8        | ≤2        | ≤1        | ≤1        | ≤0.12        | ≤0.5        | ≤1        | ≥512        | ≥64        | 0.5      | 160        |
| IHIT32291                 | CE-AB30          | ≥16            | 6               | ≥128      | ≥8        | ≥8        | ≤2        | ≤1        | ≤1        | ≤0.12        | ≤0.5        | ≤1        | ≥512        | ≥64        | 1        | 160        |
| IHIT32293                 | CE-AB31          | 8              | 8               | ≥128      | ≥8        | ≥8        | ≤2        | ≤1        | ≤1        | ≤0.12        | ≤0.5        | 2         | 256         | ≥64        | 1        | 160        |
| IHIT32295                 | CE-AB32          | 8              | 6               | ≥128      | 4         | ≥8        | ≤2        | ≤1        | ≤1        | ≤0.12        | ≤0.5        | ≤1        | 256         | ≥64        | 0.5      | 160        |
| IHIT32298                 | CE-AB33          | ≥16            | 8               | ≥128      | ≥8        | ≥8        | ≤2        | ≤1        | ≤1        | ≤0.12        | ≤0.5        | ≤1        | ≥512        | ≥64        | 0.5      | 160        |
| IHIT32299                 | CE-AB34          | ≥16            | 8               | ≥128      | ≥8        | ≥8        | ≤2        | ≤1        | ≤1        | ≤0.12        | ≤0.5        | ≤1        | ≥512        | ≥64        | 0.5      | 160        |
| IHIT33967                 | CE-AB35          | ≥16            | 8               | ≥128      | ≥8        | ≥8        | ≤2        | ≤1        | ≤1        | ≤0.12        | ≤0.5        | ≤1        | ≥512        | ≥64        | 0.5      | 160        |
| IHIT34210                 | CE-AB36          | ≥16            | 8               | ≥128      | ≥8        | ≥8        | ≤2        | ≤1        | ≤1        | ≤0.12        | ≤0.5        | ≤1        | ≥512        | ≥64        | 1        | 160        |
| IHIT34211                 | CE-AB37          | ≥16            | 6               | ≥128      | ≥8        | ≥8        | ≤2        | ≤1        | ≤1        | ≤0.12        | ≤0.5        | ≤1        | ≥512        | ≥64        | 1        | 160        |
| IHIT34212                 | CE-AB38          | ≥16            | 6               | ≥128      | ≥8        | ≥8        | ≤2        | ≤1        | ≤1        | ≤0.12        | ≤0.5        | ≤1        | ≥512        | ≥64        | 1        | 160        |
| IHIT34607                 | CE-AB39          | ≥16            | 6               | ≥128      | ≥8        | ≥8        | ≤2        | ≤1        | ≤1        | ≤0.12        | ≤0.5        | ≤1        | ≥512        | ≥64        | 1        | 160        |
| <b>ATCC 17978</b>         | <b>Recipient</b> | <b>≤1</b>      | <b>≤1</b>       | <b>16</b> | <b>≥8</b> | <b>≥8</b> | <b>≤2</b> | <b>≤1</b> | <b>≤1</b> | <b>≤0.12</b> | <b>≤0.5</b> | <b>≤1</b> | <b>≥512</b> | <b>≥64</b> | <b>2</b> | <b>160</b> |

MICs were determined with the VITEK 2 system; (MICs for imipenem were additionally determined by antibiotic gradient strips (E-test); all isolates were resistant to ampicillin, amoxicillin/clavulanate, cephalexin, and chloramphenicol in accordance to the definitions of intrinsic resistance for *Acinetobacter* spp. set by EUCAST and CLSI. IMP, imipenem; PIP, piperacillin; CPD, cefpodoxime; CTF, ceftiofur; ENR, enrofloxacin; MAR, marbofloxacin; AMK, amikacin; GEN, gentamicin; TOB, tobramycin; TET, tetracycline; CHL, chloramphenicol; PMB, polymyxin B; SXT, sulfamethoxazole/trimethoprim; NIT, nitrofurantoin.
