# Supplementary material for: Genomic Analysis of Acinetobacter baumannii Isolates Carrying OXA-23 and OXA-58 Genes from Animals Reveals ST1 and ST25 as Major Clonal Lineages
Source: MDPI journal article supplement (doi:10.3390/antibiotics11081045), 2022-08-03
Supplement: s1 [file s1]

**Supplemental Table S3:** Primers used for the determination of genetic regions flanking the *bla*<sub>OXA-23</sub> and *bla*<sub>OXA-58</sub> genes in *Acinetobacter baumannii*

| PCR           | Target region                               | Primer name<br>(Primer ID IHIT) | Primer sequence (5' - 3')                      | Amplicon size                               | Primer<br>reference | OXA region with<br>positive PCR reaction* |
|---------------|---------------------------------------------|---------------------------------|------------------------------------------------|---------------------------------------------|---------------------|-------------------------------------------|
| <b>OXA-23</b> |                                             |                                 |                                                |                                             |                     |                                           |
| 1             | ISAbal<br><i>ATPase</i>                     | ISAbal-A_RP<br>ATPase-univ-R    | CCACGATAAACGATTGCGAGCA<br>GCAACCGTCGACATCTGTTA | 1.703 bp                                    | PS<br>[1]           | a, b, c, d, e                             |
| 2             | ISAbal<br><i>traL</i>                       | ISAbal-B_RP<br>TraL_RP          | CGGTGAGCAGTGGTTTACAT<br>CTTCAAGACCGCATCCAACA   | 1.362 bp                                    | PS<br>PS            | b, c, e                                   |
| 3             | ISAbal<br><i>korB</i>                       | ISAbal_FWD<br>KorB_RP           | TTGGTTGGTCGGGTGAACT<br>AAGAAGGCGTGGCAGAGAAT    | 3.660 bp                                    | PS<br>PS            | e                                         |
| 4             | <i>traD</i><br><i>Hypothetical protein</i>  | TraD_Fwd<br>HP4_IHIT29996_REV   | AGGCCGACTTACCCAATCAC<br>TTGGCTGCATCATTTTCAGC   | 2.212 bp                                    | PS<br>PS            | e                                         |
| 5             | <i>Replication protein</i><br><i>strB</i>   | ReplP_FWD<br>StrB_RP            | TGGCACTATCATTGCCTGGAC<br>CGATCAAGCAGGTGCGACA   | 3.023 bp                                    | PS<br>[3]           | b                                         |
| 6             | <i>strA</i><br><i>topB</i>                  | StrA-RP<br>TopB_RP              | GCAACCAGTCAGAATGCGAT<br>GGTCATGTTCTGCATATCCTA  | 1.856 bp                                    | [3]<br>PS           | b                                         |
| 7             | <i>ATPase</i><br><i>parB</i>                | ATPase-intern1<br>ParB-RP       | TCAGGAAGATCGGACAGATC<br>CATCTAGGAGAGCTTCGCAA   | 1.092 bp (b); 2.504 bp (c);<br>2.383 bp (d) | [1]<br>PS           | b, c, d                                   |
| 8             | <i>Hypothetical protein</i><br><i>higB2</i> | HP2_IHIT32289_REV<br>HigB2_FWD  | ATCCGGGTGCATGAGTGAC<br>AACTGGGGCCAAATCTAGGC    | 2.192 bp                                    | PS<br>PS            | e                                         |
| 9             | <i>dnaJ</i><br><i>Hypothetical protein</i>  | DnaJ_FWD<br>HP3_IHIT29996_REV   | ATATCTTCAGTCGAGCCGCC<br>AACGGTGGAGCAGAAGAAAGT  | 1.604 bp                                    | PS<br>PS            | e                                         |
| 10            | ISAbal<br><i>comM</i>                       | ISAbal_FWD<br>ComM-REV          | TTGGTTGGTCGGGTGAACT<br>TTGCCTCTGGTCAACTTCCG    | 3.270 bp                                    | PS<br>PS            | a                                         |
| 11            | <i>bla</i> <sub>OXA-23</sub><br><i>comM</i> | OXA-23_FWD<br>ComM-REV          | TGTCCTTGAACAATCTGACTC<br>TTGCCTCTGGTCAACTTCCG  | 4.087 bp                                    | [1]<br>PS           | a                                         |
| 12            | <i>sulP</i><br><i>ATPase</i>                | SulP-FWD<br>ATPase-intern1      | TCAACGCCTGCAATAATGG<br>TCAGGAAGATCGGACAGATC    | 2.258 bp                                    | PS<br>[1]           | a                                         |

| PCR           | Target region                                               | Primer name<br>(Primer ID IHIT) | Primer sequence (5` - 3`) | Amplicon size                | Primer<br>reference | OXA region with<br>positive PCR reaction* |
|---------------|-------------------------------------------------------------|---------------------------------|---------------------------|------------------------------|---------------------|-------------------------------------------|
| <b>OXA-58</b> |                                                             |                                 |                           |                              |                     |                                           |
| <b>13</b>     | <i>bla</i> <sub>OXA-58</sub><br><i>araC</i>                 | OXA-58_FWD                      | AAGTATTGGGGCTTGTGCTG      | 2.110 bp (A-D); 3.395 bp (E) | [2]                 | A, B, C, D                                |
|               |                                                             | AraC_REV                        | CGTAGGGTTGATTTCGATAGCA    |                              | [3]                 |                                           |
| <b>14</b>     | <i>adh</i><br><i>bla</i> <sub>OXA-58</sub>                  | Adh_FWD                         | ACCAAGATCCGTTCCACAAA      | 1.412 bp                     | PS                  | A, B                                      |
|               |                                                             | OXA-58_REV                      | TCAACTTCCGTGCCTATTTG      |                              | [2]                 |                                           |
| <b>15</b>     | <i>repE</i><br><i>adh</i>                                   | RepE_FWD                        | ATGCTACAAGATCCCGCTCA      | 1.553 bp                     | PS                  | A                                         |
|               |                                                             | Adh_REV                         | ACGTTGGTGTGCATGGTAAG      |                              | PS                  |                                           |
| <b>16</b>     | <i>adh</i><br><i>tonB</i>                                   | Adh_FWD                         | ACCAAGATCCGTTCCACAAA      | 1.536 bp                     | PS                  | A                                         |
|               |                                                             | TonB_REV                        | ATTCCGTACCCAAGGCATCC      |                              | PS                  |                                           |
| <b>17</b>     | <i>araC</i><br><i>vapC</i>                                  | AraC_FP                         | ACAAACACTCTCAACATTGGTG    | 1.640 bp                     | [3]                 | A                                         |
|               |                                                             | VapC_REV                        | CCATAAGCATGGGCACATTGT     |                              | PS                  |                                           |
| <b>18</b>     | <i>tonB</i><br><i>spl</i>                                   | TonB_FWD                        | TTACCTCCTGCTCGTTTGGG      | 958 bp                       | PS                  | C                                         |
|               |                                                             | Spl_REV                         | ATGCCACTTTATTTCCCGCG      |                              | PS                  |                                           |
| <b>19</b>     | <i>Hypothetical protein</i><br><i>bla</i> <sub>OXA-58</sub> | HP6_IHIT29997_FWD               | ACAAGCCTGGAATTAGAGCCA     | 2.990 bp                     | PS                  | D                                         |
|               |                                                             | OXA-58_REV                      | TCAACTTCCGTGCCTATTTG      |                              | [2]                 |                                           |
| <b>20</b>     | <i>repE</i><br><i>bla</i> <sub>OXA-58</sub>                 | RepE_FWD                        | ATGCTACAAGATCCCGCTCA      | 2.730 bp                     | PS                  | C                                         |
|               |                                                             | OXA-58_REV                      | TCAACTTCCGTGCCTATTTG      |                              | [2]                 |                                           |
| <b>21</b>     | <i>Hypothetical protein</i><br><i>open reading frame</i>    | HP3_IHIT29985_FWD               | ACCTCATCTTTAGAAGCGCCA     | 699 bp                       | PS                  | C                                         |
|               |                                                             | ORF_IHIT29985_REV               | TTGTCACACACCACGCATCT      |                              | PS                  |                                           |

\* see Figures 2 and 3 of the main text for genetic structures of OXA regions; PS = present study

#### Primer references:

1. Klotz P, Goettig S, Leidner U, Semmler T, Scheufen S, Ewers C. 2017. Carbapenem-resistance and pathogenicity of bovine *Acinetobacter indicus*-like isolates. PLOS ONE 12(2):e0171986. doi: 10.1371/journal.pone.0171986
2. Groebner S, Linke D, Schutz W, Fladerer C, Madlung J, Autenrieth IB, Witte W, Pfeifer Y. 2009. Emergence of carbapenem-non-susceptible extended-spectrum  $\beta$ -lactamase-producing *Klebsiella pneumoniae* isolates at the university hospital of Tübingen, Germany. Journal of Medical Microbiology 58:912–922. doi: 10.1099/jmm.0.005850-0.
3. Klotz P, Jacobmeyer L, Leidner U, Stamm I, Semmler T, Ewers C. 2018. *Acinetobacter pittii* from Companion Animals Coharboring *bla*<sub>OXA-58</sub>, the *tet*(39) Region, and Other Resistance Genes on a Single Plasmid. Antimicrobial Agents and Chemotherapy 62(1):e01993-17. doi: 10.1128/AAC.01993-17.

## Supplemental Table S3 continued:

According to the different genetic environments of *bla*<sub>OXA-23</sub> and *bla*<sub>OXA-58</sub> genes (see Figure 2 and Figure 3 of the main text), *bla*<sub>OXA-23</sub> and *bla*<sub>OXA-58</sub>-positive *A. baumannii* strains revealed different PCR results:

|                           |                                                                | PCR numbers (positive PCR results are indicated by blue-filled boxes) |   |   |   |   |   |   |   |   |    |    |    |    |    |    |    |    |    |    |    |    |
|---------------------------|----------------------------------------------------------------|-----------------------------------------------------------------------|---|---|---|---|---|---|---|---|----|----|----|----|----|----|----|----|----|----|----|----|
| OXA gene flanking pattern | Location of <i>bla</i> <sub>OXA</sub> gene and/or plasmid size | 1                                                                     | 2 | 3 | 4 | 5 | 6 | 7 | 8 | 9 | 10 | 11 | 12 | 13 | 14 | 15 | 16 | 17 | 18 | 19 | 20 | 21 |
|                           |                                                                | OXA-23                                                                |   |   |   |   |   |   |   |   |    |    |    |    |    |    |    |    |    |    |    |    |
| a                         | chromosome                                                     |                                                                       |   |   |   |   |   |   |   |   |    |    |    |    |    |    |    |    |    |    |    |    |
| b                         | 48.4 kb                                                        |                                                                       |   |   |   |   |   |   |   |   |    |    |    |    |    |    |    |    |    |    |    |    |
| c                         | 55.8 kb                                                        |                                                                       |   |   |   |   |   |   |   |   |    |    |    |    |    |    |    |    |    |    |    |    |
| d                         | unknown                                                        |                                                                       |   |   |   |   |   |   |   |   |    |    |    |    |    |    |    |    |    |    |    |    |
| e                         | 71.3 kb                                                        |                                                                       |   |   |   |   |   |   |   |   |    |    |    |    |    |    |    |    |    |    |    |    |
|                           |                                                                | OXA-58                                                                |   |   |   |   |   |   |   |   |    |    |    |    |    |    |    |    |    |    |    |    |
| A                         | 21.1 kb                                                        |                                                                       |   |   |   |   |   |   |   |   |    |    |    |    |    |    |    |    |    |    |    |    |
| B                         | 11.3 kb                                                        |                                                                       |   |   |   |   |   |   |   |   |    |    |    |    |    |    |    |    |    |    |    |    |
| C                         | 12.6 kb                                                        |                                                                       |   |   |   |   |   |   |   |   |    |    |    |    |    |    |    |    |    |    |    |    |
| D                         | 12.3 kb                                                        |                                                                       |   |   |   |   |   |   |   |   |    |    |    |    |    |    |    |    |    |    |    |    |
